# Supplementary material
Source: Copernicus journal article supplement (doi:10.5194/essd-2026-246)
Supplement: Supplementary file 1 [file essd-2026-246-supplement.pdf]

# A Moderate-Resolution, Long-Term Global Radar-Based Forest Above-Ground Biomass Dataset from 1993 to 2020

Guohua Liu<sup>1,2</sup>, Philippe Ciais<sup>3</sup>, Shengli Tao<sup>4</sup>, Hui Yang<sup>5</sup>, Chenwei Xiao<sup>1,2</sup>, and Ana Bastos<sup>1,2</sup>

<sup>1</sup>Leipzig University, Institute for Earth System Science and Remote Sensing, 04103 Leipzig, Germany

<sup>2</sup>Max Planck Institute for Biogeochemistry, 07745 Jena, Germany

<sup>3</sup>Laboratoire Sciences du Climat et de l'Environnement, 91191 Paris, France

<sup>4</sup>Institute of Ecology, College of Urban and Environmental Sciences, State Key Laboratory of Vegetation Structure, Function and Construction (VegLab), Peking University, 100871 Beijing, China

<sup>5</sup>College of Urban and Environmental Sciences, Peking University, 100871 Beijing, China

**Correspondence:** Guohua Liu (guohua.liu@uni-leipzig.de)

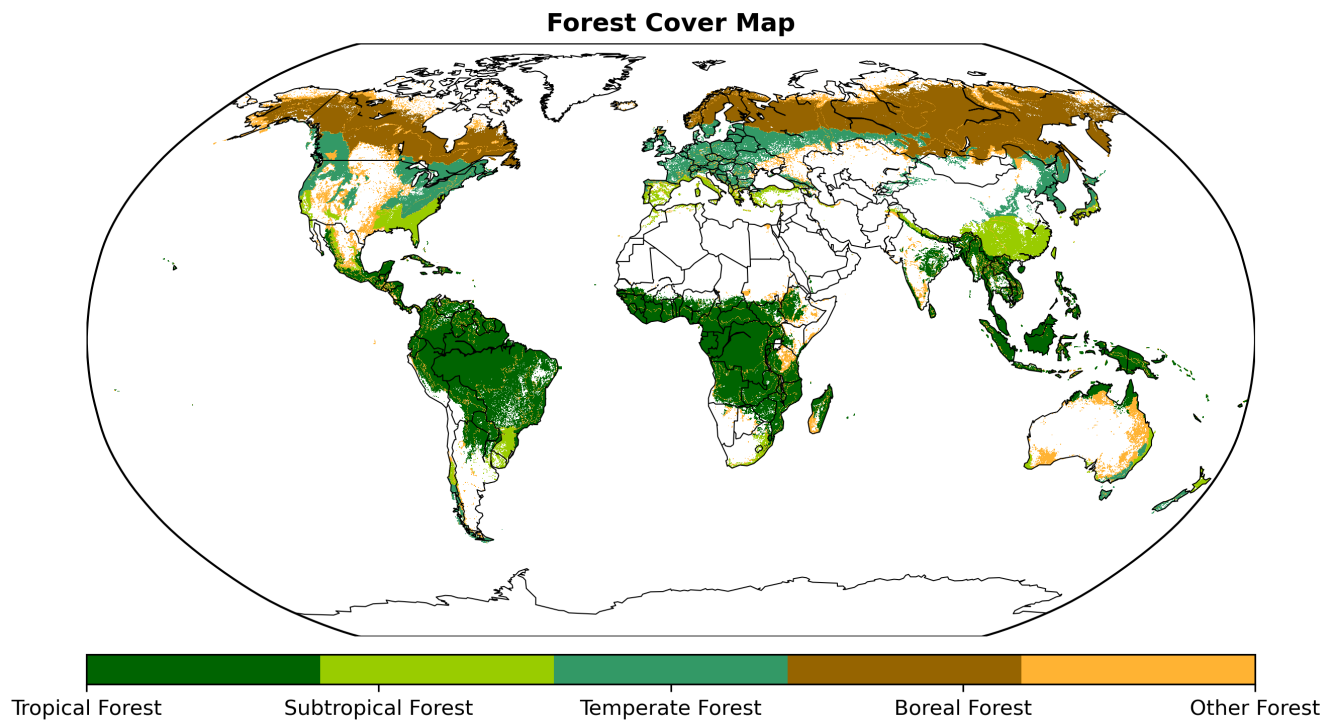

**Figure S1.** Ecoregion maps used in this study.

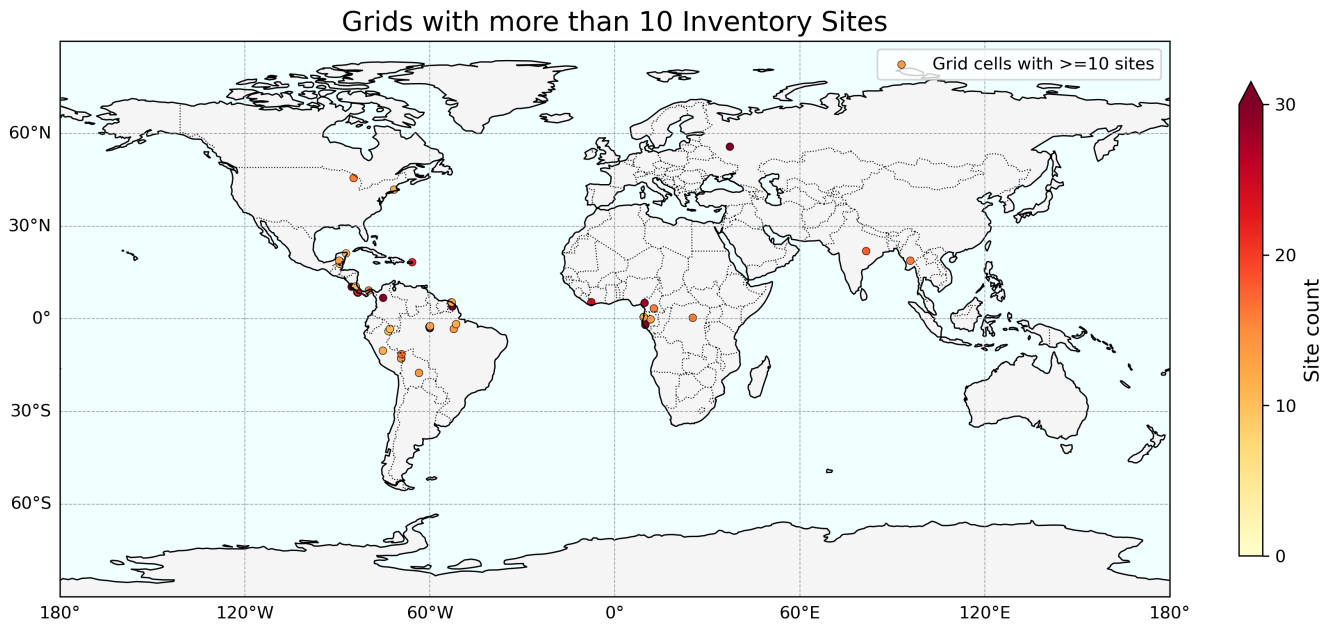

**Figure S2.** Spatial distribution of grid cells containing at least 10 inventory plots.

**Table S1.** Legend of the FAO Global Ecological Zones dataset (FAO, 2001)

| Domain             | Zone code | Zone name                       |
|--------------------|-----------|---------------------------------|
| Tropical forest    | 11        | Tropical rain forest            |
|                    | 12        | Tropical moist deciduous forest |
|                    | 13        | Tropical dry forest             |
|                    | 16        | Tropical mountain systems       |
| Subtropical forest | 21        | Subtropical humid forest        |
|                    | 22        | Subtropical dry forest          |
|                    | 25        | Subtropical mountain systems    |
| Temperate forest   | 31        | Temperate oceanic forest        |
|                    | 32        | Temperate continental forest    |
|                    | 35        | Temperate mountain systems      |
| Boreal forest      | 41        | Boreal coniferous forest        |
|                    | 42        | Boreal tundra woodland          |
|                    | 43        | Boreal mountain systems         |

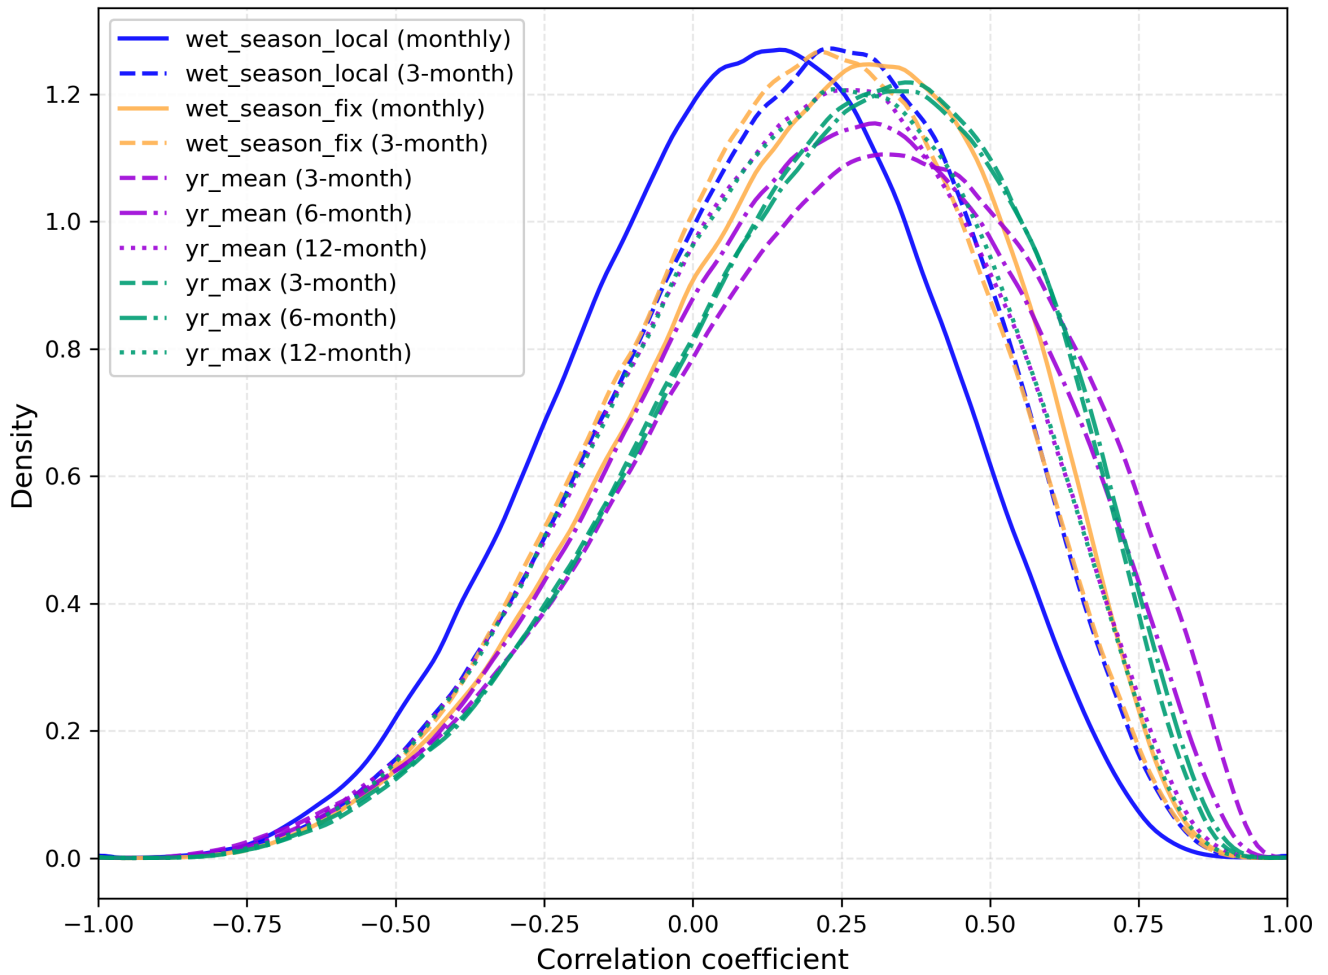

**Figure S3.** Distribution of correlation coefficients between radar signal index and soil moisture. Four classes are presented: wet season local (blue), wet season fixed (orange), yearly mean (purple), and yearly maximum (teal). Within each class, different line styles distinguish temporal windows: solid line for monthly values, dashed line for 3-month moving averages, dash-dot line for 6-month moving averages, and dotted line for 12-month moving averages.

**A. This study**

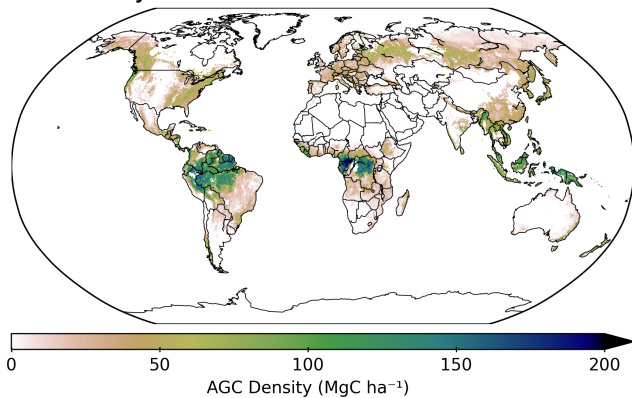

**B. Santoro et al.**

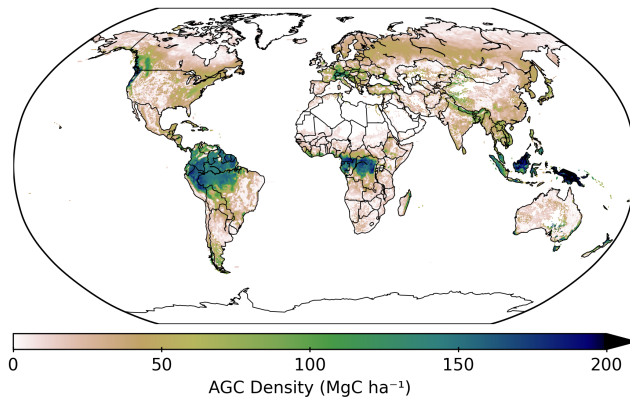

**C. Xu et al.**

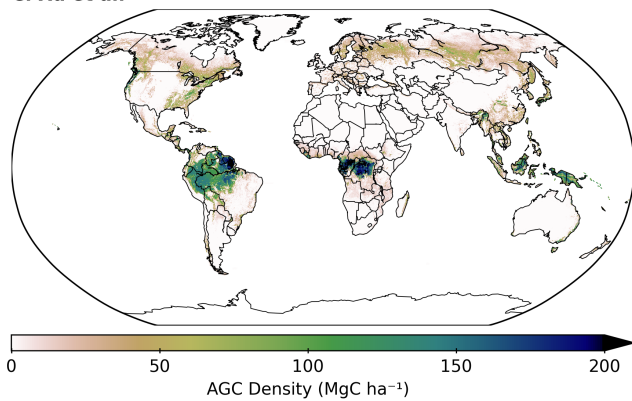

**D. SMOS**

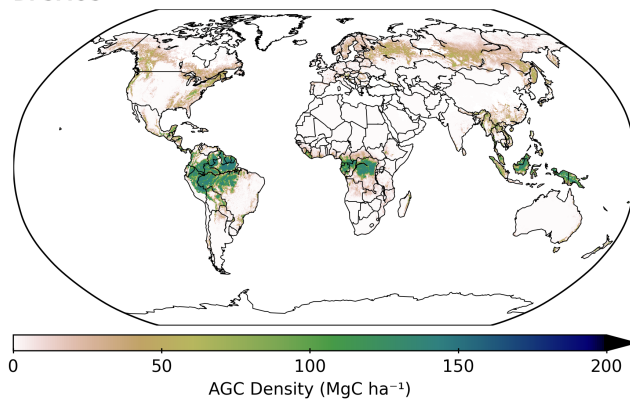

**Figure S4.** Comparison of the mean spatial distribution in AGC from 2017 to 2020 between our study and three other AGC products.
